# Supplementary material for: Klebsiella pneumoniae carrying multiple alleles of antigen 43-encoding gene of Escherichia coli associated with biofilm formation
Source: Springer Nature journal article supplement (doi:10.1007/s10096-023-04552-6), 2023-01-25
Supplement: MOESM1 [file 10096_2023_4552_MOESM1_ESM.pdf]

*Klebsiella pneumoniae* carrying multiple alleles of Antigen 43-encoding gene of *Escherichia coli* associated with biofilm formation

Martina Tambassi,<sup>a#</sup> Elena Passarini,<sup>a,b</sup> Ilaria Menozzi,<sup>a</sup> Melissa Berni,<sup>a</sup> Chiara Bracchi,<sup>a</sup> Alessandra Dodi,<sup>a</sup> Luca Bolzoni,<sup>a</sup> Erika Scaltriti,<sup>a</sup> Marina Morganti,<sup>a</sup> Giulia Ferrarini,<sup>c</sup> Laura Sordi,<sup>c</sup> Mario Sarti,<sup>c</sup> Simone Ambretti,<sup>d</sup> Stefano Pongolini<sup>a</sup>

<sup>a</sup> Risk Analysis and Genomic Epidemiology Unit, Istituto Zooprofilattico Sperimentale della Lombardia e dell'Emilia-Romagna (IZSLER), Parma, Italy

<sup>b</sup> Department of Chemistry, Life Sciences and Environmental Sustainability, University of Parma, Parma, Italy

<sup>c</sup> Clinical Microbiology Unit, AUSL Modena, Baggiovara, Italy

<sup>d</sup> Microbiology Unit, IRCCS Azienda Ospedaliero-Universitaria di Bologna, Bologna, Italy

## **Supplementary material**

This file contains:

Fig. S1

Table S1

Table S2

Supplementary methods

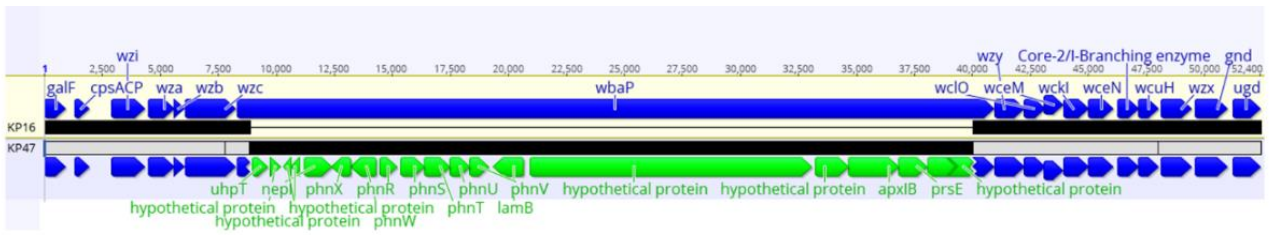

**Fig. S1.** CPS cluster of KP47 and KP16 strains. Sequence of CPS cluster of KP47 was aligned to that of KP16 control strain. CPS genes are displayed in blue, genes belonging to the insertion in *wbaP* gene are displayed in green.

**Table S1.** Primers used for qRT-PCR reactions.

| <b>GENE</b> | <b>SEQUENCE (5'-3')</b>                               |
|-------------|-------------------------------------------------------|
| <i>flu1</i> | FW: CTGAATGGCGATGTGGTCAG<br>RV: CCCTGACCGGTGAAGTTAC   |
| <i>flu2</i> | FW: GTGATACCGGGCAGTTTGTTC<br>RV: GCCGGCATAAACCACAGTG  |
| <i>flu3</i> | FW: CATTTACCTCCTCACGCAC<br>RV: ATTGTTCTGCGCCATATCCG   |
| <i>wza</i>  | FW: ACGTGGTTGAACTCCCAGAT<br>RV: AGTACGTCACCAACCCCAAT  |
| <i>wzy</i>  | FW: GGAACAATGTGGACCGGTTT<br>RV: ACCCAATCACCATCATCATCA |
| <i>rpoD</i> | FW: CAACCGTATCTCCCGTCAGA<br>RV: GGCTCTTTGGCGATCTTCAG  |

**Table S2.** List of complete genomes carrying at least one *flu* gene and related information about the position on the genome, size and allele number (with % of coverage and identity) for each *flu* gene detected.

| Genome ID                    | MLST      | Start   | End     | Flu size (bp) | % Coverage | % Identity           | Flu Allele           |                      |
|------------------------------|-----------|---------|---------|---------------|------------|----------------------|----------------------|----------------------|
| GCA_009914255_1_ASM991425v1  | 11        | 708842  | 711688  | 2847          | 100.00     | 99.97                | Ecoli_Flu_b2000_2727 |                      |
| GCA_013378155_1_ASM1337815v1 |           | 698128  | 700974  | 2847          | 100.00     | 99.97                | Ecoli_Flu_b2000_2727 |                      |
|                              |           | 4804040 | 4806886 | 2847          | 100.00     | 99.26                | Ecoli_Flu_b2000_2713 |                      |
| GCA_013378175_1_ASM1337817v1 |           | 698128  | 700974  | 2847          | 100.00     | 99.97                | Ecoli_Flu_b2000_2727 |                      |
|                              |           | 4804287 | 4807133 | 2847          | 100.00     | 99.26                | Ecoli_Flu_b2000_2713 |                      |
| GCA_013378195_1_ASM1337819v1 |           | 698128  | 700974  | 2847          | 100.00     | 99.97                | Ecoli_Flu_b2000_2727 |                      |
|                              |           | 4804470 | 4807316 | 2847          | 100.00     | 99.26                | Ecoli_Flu_b2000_2713 |                      |
| GCA_013378215_1_ASM1337821v1 |           | 698128  | 700974  | 2847          | 100.00     | 99.97                | Ecoli_Flu_b2000_2727 |                      |
|                              |           | 4805247 | 4808093 | 2847          | 100.00     | 99.26                | Ecoli_Flu_b2000_2713 |                      |
| GCA_013378235_1_ASM1337823v1 |           | 698128  | 700974  | 2847          | 100.00     | 99.97                | Ecoli_Flu_b2000_2727 |                      |
|                              |           | 4804470 | 4807316 | 2847          | 100.00     | 99.26                | Ecoli_Flu_b2000_2713 |                      |
| GCA_013378295_1_ASM1337829v1 |           | 698128  | 700974  | 2847          | 100.00     | 99.97                | Ecoli_Flu_b2000_2727 |                      |
|                              |           | 4804041 | 4806887 | 2847          | 100.00     | 99.26                | Ecoli_Flu_b2000_2713 |                      |
| GCA_013378315_1_ASM1337831v1 |           | 698128  | 700974  | 2847          | 100.00     | 99.97                | Ecoli_Flu_b2000_2727 |                      |
|                              |           | 4804107 | 4806953 | 2847          | 100.00     | 99.26                | Ecoli_Flu_b2000_2713 |                      |
| GCA_013416085_1_ASM1341608v1 |           | 698128  | 700974  | 2847          | 100.00     | 99.97                | Ecoli_Flu_b2000_2727 |                      |
|                              |           | 4804040 | 4806886 | 2847          | 100.00     | 99.26                | Ecoli_Flu_b2000_2713 |                      |
| GCA_013416105_1_ASM1341610v1 |           | 698128  | 700974  | 2847          | 100.00     | 99.37                | Ecoli_Flu_b2000_2727 |                      |
|                              |           | 4803306 | 4806152 | 2847          | 100.00     | 99.26                | Ecoli_Flu_b2000_2713 |                      |
| GCA_013416125_1_ASM1341612v1 |           | 4766448 | 4769294 | 2847          | 100.00     | 99.26                | Ecoli_Flu_b2000_2713 |                      |
| GCA_022353825_1_ASM2235382v1 |           | 4260813 | 4263659 | 2847          | 100.00     | 100.00               | Ecoli_Flu_b2000_2882 |                      |
| GCA_022354545_1_ASM2235454v1 |           | 726106  | 728952  | 2847          | 100.00     | 99.97                | Ecoli_Flu_b2000_2727 |                      |
|                              |           | 4812406 | 4815252 | 2847          | 100.00     | 99.33                | Ecoli_Flu_b2000_2713 |                      |
| GCA_022493975_1_ASM2249397v1 |           | 726106  | 728952  | 2847          | 100.00     | 99.97                | Ecoli_Flu_b2000_2727 |                      |
|                              |           | 4811149 | 4813995 | 2847          | 100.00     | 99.33                | Ecoli_Flu_b2000_2713 |                      |
| GCA_902650055_1_Kp_294_4     |           | 5469292 | 5472138 | 2847          | 100.00     | 99.97                | Ecoli_Flu_b2000_2727 |                      |
| GCA_001521895_1_ASM152189v1  |           | 14      | 3016076 | 3018922       | 2847       | 100.00               | 96.52                | Ecoli_Flu_b2000_2740 |
| GCA_002209405_1_ASM220940v1  |           | 2392646 | 2395492 | 2847          | 100.00     | 99.33                | Ecoli_Flu_b2000_2713 |                      |
| GCA_003054385_1_ASM305438v1  |           | 1202564 | 1205410 | 2847          | 100.00     | 99.33                | Ecoli_Flu_b2000_2713 |                      |
| GCA_004295385_1_ASM429538v1  |           | 12885   | 15731   | 2847          | 100.00     | 99.33                | Ecoli_Flu_b2000_2713 |                      |
| GCA_004295605_1_ASM429560v1  |           | 743870  | 746716  | 2847          | 100.00     | 99.89                | Ecoli_Flu_b2000_2796 |                      |
| GCA_004319525_1_ASM431952v1  |           | 3407076 | 3409922 | 2847          | 100.00     | 99.33                | Ecoli_Flu_b2000_2713 |                      |
| GCA_011769825_1_ASM1176982v1 |           | 752947  | 755793  | 2847          | 100.00     | 99.33                | Ecoli_Flu_b2000_2713 |                      |
| GCA_012970325_1_ASM1297032v1 | 4857008   | 4859854 | 2847    | 100.00        | 99.33      | Ecoli_Flu_b2000_2713 |                      |                      |
| GCA_012970685_1_ASM1297068v1 | 4721606   | 4724452 | 2847    | 100.00        | 99.33      | Ecoli_Flu_b2000_2713 |                      |                      |
| GCA_012971665_1_ASM1297166v1 | 4713977   | 4716823 | 2847    | 100.00        | 99.33      | Ecoli_Flu_b2000_2713 |                      |                      |
| GCA_014123345_1_ASM1412334v1 | 697105    | 699952  | 2488    | 87.39         | 99.96      | Ecoli_Flu_b2000_2727 |                      |                      |
| GCA_022354365_1_ASM2235436v1 | 2293818   | 2296664 | 2821    | 99.09         | 99.97      | Ecoli_Flu_b2000_2713 |                      |                      |
| GCA_022434315_1_ASM2243431v1 | 4671938   | 4674784 | 2847    | 100.00        | 99.33      | Ecoli_Flu_b2000_2713 |                      |                      |
| GCA_023066625_1_ASM2306662v1 | 4648982   | 4692828 | 2847    | 100.00        | 99.30      | Ecoli_Flu_b2000_2713 |                      |                      |
| GCA_023066645_1_ASM2306664v1 | 4649623   | 4652469 | 2847    | 100.00        | 99.33      | Ecoli_Flu_b2000_2713 |                      |                      |
| GCA_023205035_1_ASM2320503v1 | 786564    | 789410  | 2847    | 100.00        | 98.42      | Ecoli_Flu_b2000_2599 |                      |                      |
| GCA_00812105_1_ASM381210v1   | 221499    | 224345  | 2847    | 100.00        | 98.03      | Ecoli_Flu_b2000_2653 |                      |                      |
| GCA_014788765_1_ASM1478876v1 | 4920267   | 4923113 | 2847    | 100.00        | 98.03      | Ecoli_Flu_b2000_2653 |                      |                      |
| GCA_022964795_1_ASM2296479v1 | 36        | 4809881 | 4812727 | 2847          | 100.00     | 99.37                | Ecoli_Flu_b2000_2713 |                      |
| GCA_022354125_1_ASM2235412v1 | 39        | 102299  | 105145  | 2847          | 100.00     | 100.00               | Ecoli_Flu_b2000_2619 |                      |
| GCA_021166135_1_ASM2116613v1 | 147       | 4704585 | 4707431 | 2847          | 100.00     | 99.33                | Ecoli_Flu_b2000_2713 |                      |
| GCA_018314115_1_ASM1831411v1 | 273       | 4723748 | 4726594 | 2847          | 100.00     | 99.33                | Ecoli_Flu_b2000_2713 |                      |
| GCA_011045775_1_ASM1104577v1 | 395       | 3970356 | 3973202 | 2847          | 100.00     | 99.97                | Ecoli_Flu_b2000_2727 |                      |
| GCA_015278095_1_ASM1527809v1 | 629       | 1817514 | 1820360 | 2847          | 100.00     | 99.02                | Ecoli_Flu_b2000_2713 |                      |
| GCA_014169335_1_ASM1416933v1 | 655       | 4657655 | 4660501 | 2847          | 100.00     | 99.33                | Ecoli_Flu_b2000_2713 |                      |
| GCA_022354665_1_ASM2235466v1 | 661       | 4557997 | 4560843 | 2847          | 100.00     | 99.33                | Ecoli_Flu_b2000_2713 |                      |
| GCA_022355525_1_ASM2235552v1 | 709       | 4166010 | 4168856 | 2847          | 100.00     | 99.93                | Ecoli_Flu_b2000_2814 |                      |
| GCA_020023465_1_ASM2002346v1 | 727       | 3510248 | 3513094 | 2847          | 100.00     | 99.33                | Ecoli_Flu_b2000_2713 |                      |
|                              |           | 4866144 | 4868990 | 2847          | 100.00     | 98.17                | Ecoli_Flu_b2000_2639 |                      |
|                              |           | 4771716 | 4774562 | 2847          | 100.00     | 99.33                | Ecoli_Flu_b2000_2713 |                      |
| GCA_020172745_1_ASM2017274v1 | 707701    | 710547  | 2847    | 100.00        | 98.17      | Ecoli_Flu_b2000_2639 |                      |                      |
| GCA_017310405_1_ASM1731040v1 | 1128      | 735326  | 738172  | 2847          | 100.00     | 100.00               | Ecoli_Flu_b2000_2844 |                      |
| GCA_018454365_1_ASM1845436v1 | 856669    | 859156  | 2488    | 87.39         | 99.96      | Ecoli_Flu_b2000_2727 |                      |                      |
| GCA_019823785_1_ASM1982378v1 | 929790    | 932277  | 2488    | 87.39         | 99.96      | Ecoli_Flu_b2000_2727 |                      |                      |
| GCA_019823895_1_ASM1982389v1 | 862183    | 864670  | 2488    | 87.39         | 99.96      | Ecoli_Flu_b2000_2727 |                      |                      |
| GCA_020080125_1_ASM2008012v1 | 934516    | 937003  | 2488    | 87.39         | 99.96      | Ecoli_Flu_b2000_2727 |                      |                      |
| GCA_019038575_1_ASM1903857v1 | 5236      | 4812245 | 4815091 | 2847          | 100.00     | 98.31                | Ecoli_Flu_b2000_2599 |                      |
| GCA_022494335_1_ASM2249433v1 | NA        | 4118085 | 4120932 | 2848          | 100.00     | 99.19                | Ecoli_Flu_b2000_2727 |                      |
| GCA_022809875_1_ASM2280987v1 | ST248-11V | 137916  | 140765  | 2850          | 100.00     | 98.21                | Ecoli_Flu_b2000_2664 |                      |
| GCA_017639065_1_ASM1763906v1 | 307       | 723900  | 726746  | 2847          | 100.00     | 98.42                | Ecoli_Flu_b2000_2599 |                      |
|                              |           | 680554  | 683400  | 2847          | 100.00     | 99.51                | Ecoli_Flu_b2000_2570 |                      |
|                              |           | 765420  | 768266  | 2847          | 100.00     | 97.75                | Ecoli_Flu_b2000_2661 |                      |
|                              |           | 4999178 | 5002297 | 3120          | 100.00     | 99.81                | Ecoli_Flu_b2000_293  |                      |
|                              |           | 1584741 | 1587587 | 2847          | 100.00     | 97.75                | Ecoli_Flu_b2000_2661 |                      |
| KP47                         | 307       | 1669606 | 1672452 | 2847          | 100.00     | 99.51                | Ecoli_Flu_b2000_2570 |                      |
| KP34                         |           | 2850808 | 2853927 | 3120          | 100.00     | 99.81                | Ecoli_Flu_b2000_293  |                      |

## Supplementary methods

**RNA extraction.** For the stationary phase condition, strains were incubated in 3 ml of LB overnight at 37°C with shaking and RNA extraction was performed on 100 µl of bacterial culture. For the exponential phase condition, overnight cultures were diluted at OD<sub>600</sub> 0.1 and, after 100 min of incubation at 37°C with shaking, 1 ml of culture was used for RNA extraction. For biofilm-planktonic and biofilm-sessile phases, strains were inoculated in 3 ml of LB broth and incubated overnight at 37°C with shaking. The following day cultures were diluted as for the biofilm formation assay and incubated for 24h at 37°C in a 96-well polystyrene plate with round bottom. Concerning planktonic cells, 100 µl of bacterial culture per strain were collected for RNA extraction, whereas biofilm cells were washed twice with 200 µl of PBS and resuspended in 100 µl of PBS by scraping the bottom of the well with pipette tips. For each strain, biofilm-forming cells were collected from eight wells to obtain enough cells for RNA extraction. Bacterial cultures were transferred in 1.5 ml tube and 2 volumes of RNAprotect Bacteria Reagent were added (QIAGEN). After vortexing and incubating at room temperature for 5 min, samples were centrifuged for 10 min at 5000 x g, the supernatant discarded and enzymatic lysis of the pellet was performed for 10 min at 37°C with 1 mg/ml of lysozyme (Sigma-Aldrich) in Tris-EDTA. The extraction was carried out using Nucleospin Macherey Nagel RNA extraction kit following manufacture's protocol. Both in-column and in-solution DNase digestion was performed. RNA was precipitated by mixing with sodium acetate (0.1 Volume, 1M, Thermo-scientific), ethanol (2.5 Volumes, 100%, Sigma-Aldrich) and glycogen (1 µl, 20 mg/ml, Invitrogen). After overnight incubation at -20°C, RNA was washed twice with 750 µl of 100% ice-cold ethanol and resuspended in water. RNA concentration and purity (A<sub>260</sub>/A<sub>280</sub>) were determined with a Synergy H1 Hybrid spectrophotometer (BioTek) equipped with Gen5 software. RNA extraction was done from three independent biological replicates. The extracted RNA was reverse transcribed using High-Capacity cDNA Reverse Transcription Kit (Applied Biosystems).

**qPCR Primer design and details.** Primers for *flu* alleles were designed to be allele specific. For this purpose, the three alleles were aligned by ClustalW 2.1 [1] and point mutations specific of each allele

were found. Allele specific-primers were designed such that the last and the second or the third to last base at primer 3' end were positioned at SNPs sites and checked for quality through Primer3 version 4.1.0 [2]. To determine qPCR reaction efficiency, a standard curve for each primer pair was run in triplicate. Relative quantification of gene expression was done by Pfaffl method [3] and statistical analysis was done with the Student's t test ( $P \leq 0,05$ ; two-tailed, unpaired). Amplicons of *flu* alleles were Sanger sequenced to confirm PCR specificity.

**Isolation of a spontaneous translucent KP16 mutant.** It was previously observed that *K. pneumoniae* strains can exhibit opaque, capsulated colonies with translucent segments, corresponding to spontaneous mutants which produce less capsule than the wildtype strain due to accumulated insertion sequences, point mutations or small insertion–deletion mutations on CPS genes. The ability of capsulated colonies to produce translucent segments is dependent on the incubation time (> 24 h) [4]. Therefore, to isolate a spontaneous KP16 mutant with impaired ability to produce capsule was isolated from translucent segments of KP16 colonies generated by streaking, KP16 strain was streaked on Luria Bertani (LB) agar and incubated at 37°C until bacterial colonies with translucent segments were observed. A KP16 mutant (KP16 $\Delta$ c) was isolated by streaking a translucent colony segment on LB agar to obtain single colonies and re-streaking a single colony twice more. KP16 $\Delta$ c was then Illumina sequenced to find the mutation responsible for reduced capsule production. KP16 $\Delta$ c reads were assembled by Unicycler 5.0 [5] and KP16 and KP16 $\Delta$ c assemblies were aligned by MAUVE 2.4.0 [6]. The alignment was observed at the CPS cluster level to find point mutations, indels or other insertions in CPS genes. We found that KP16 $\Delta$ c carried a single-base deletion generating a frameshift mutation in *wbaP* gene.

## Supplementary References

1. Larkin MA, Blackshields G, Brown NP, Chenna R, McGettigan PA, McWilliam H, Valentin F, Wallace IM, Wilm A, Lopez R, Thompson JD, Gibson TJ, Higgins DG. 2007. Clustal W and Clustal X version 2.0. *Bioinformatics* 23:2947-2948. DOI: [10.1093/bioinformatics/btm404](https://doi.org/10.1093/bioinformatics/btm404)
2. Koressaar T, Lepamets M, Kaplinski L, Raime K, Andreson R and Remm M. 2018. Primer3\_masker: integrating masking of template sequence with primer design software. *Bioinformatics* 34(11):1937-1938. DOI: [10.1093/bioinformatics/bty036](https://doi.org/10.1093/bioinformatics/bty036)
3. Pfaffl MW. 2001. A new mathematical model for relative quantification in real-time RT-PCR. *Nucleic Acids Res* 29(9):e45. DOI: [10.1093/nar/29.9.e45](https://doi.org/10.1093/nar/29.9.e45)
4. Chiarelli A, Cabanel N, Rosinski Chupin I, Zongo PD, Naas T, Bonnin RA, Glaser P. 2020. Diversity of mucoid to non-mucoid switch among carbapenemase-producing *Klebsiella pneumoniae*. *BMC Microbiol* 20:325. DOI: [10.1186/s12866-020-02007-y](https://doi.org/10.1186/s12866-020-02007-y)
5. Wick RR, Judd LM, Gorrie CL, Holt KE. 2017. Unicycler: resolving bacterial genome assemblies from short and long sequencing reads. *PLoS Comput Biol* 13: e1005595. DOI: [10.1371/journal.pcbi.1005595](https://doi.org/10.1371/journal.pcbi.1005595)
6. Darling AC, Mau B, Blattner FR, Perna NT. 2014. Mauve: Multiple alignment of conserved genomic sequence with rearrangements. *Genome Res* 14:1394–1403. DOI: [10.1101/gr.2289704](https://doi.org/10.1101/gr.2289704)
